# Supplementary material for: Secukinumab and Black Garlic Downregulate OPG/RANK/RANKL Axis and Devitalize Myocardial Interstitial Fibrosis Induced by Sunitinib in Experimental Rats
Source: MDPI journal article supplement (doi:10.3390/life13020308), 2023-01-22
Supplement: s1 [file s1]

# Secukinumab and Black Garlic Downregulate OPG/RANK/RANKL Axis and Devitalize Myocardial Interstitial Fibrosis Induced by Sunitinib in Experimental Rats

Hoda E. Mohamad <sup>1,\*</sup>, Mervat E. Asker <sup>1</sup>, Mohamed A. Shaheen <sup>2</sup>, Nourhan M. Baraka <sup>1</sup>, Omer I. Fantoukh <sup>3</sup>, Abdulaziz Alqahtani <sup>3</sup>, Alaa E. Salama <sup>4</sup> and Yasmin K. Mahmoud <sup>1</sup>

<sup>1</sup> Department of Biochemistry, Faculty of Pharmacy, Zagazig University, Zagazig 44519, Egypt

<sup>2</sup> Department of Histology & Cell Biology, Faculty of Medicine, Zagazig University, Zagazig 44519, Egypt

<sup>3</sup> Department of Pharmacognosy, College of Pharmacy, King Saud University, Riyadh 11451, Saudi Arabia

<sup>4</sup> Department of Cardiology, Faculty of Medicine, Zagazig University, Zagazig 44519, Egypt

\* Correspondence: hmohammed@zu.edu.eg; Tel.: +20-10-2799-4483

**Citation:** Mohamad, H.E.; Asker, M.E.; Shaheen, M.A.; Baraka, N.M.; Fantoukh, O.I.; Alqahtani, A.; Salama, A.E.; Mahmoud, Y.K. Secukinumab and Black Garlic Downregulate OPG/RANK/RANKL Axis and devitalize Myocardial Interstitial Fibrosis Induced by Sunitinib in Experimental Rats. *Life* **2023**, *13*, 308. <https://doi.org/10.3390/life13020308>

Academic Editor: Stefania Lamponi

Received: 23 December 2022

Revised: 18 January 2023

Accepted: 20 January 2023

Published: 22 January 2023

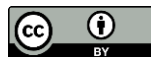

**Copyright:** © 2023 by the authors. Submitted for possible open access publication under the terms and conditions of the Creative Commons Attribution (CC BY) license (<https://creativecommons.org/licenses/by/4.0/>).

**Table S1.** Effect of treatment with sunitinib (25 mg/kg three times a week) orally for 4 weeks on serum CRP and CK-MB levels.

|             | NC            | SUN                        |
|-------------|---------------|----------------------------|
| CRP (ng/ml) | 21.78 ± 6.791 | 326.4 ± 36.12 <sup>a</sup> |
| CK-MB (U/L) | 457.1 ± 29.09 | 975.3 ± 21.74 <sup>a</sup> |

CRP: C-reactive protein; CK-MB: creatine kinase –MB; NC: normal control; SUN: sunitinib; <sup>a</sup>P< 0.001 vs. NC. The data are expressed as mean ± SD, (n =6/group); S.D: Standard deviation; n: Sample size.

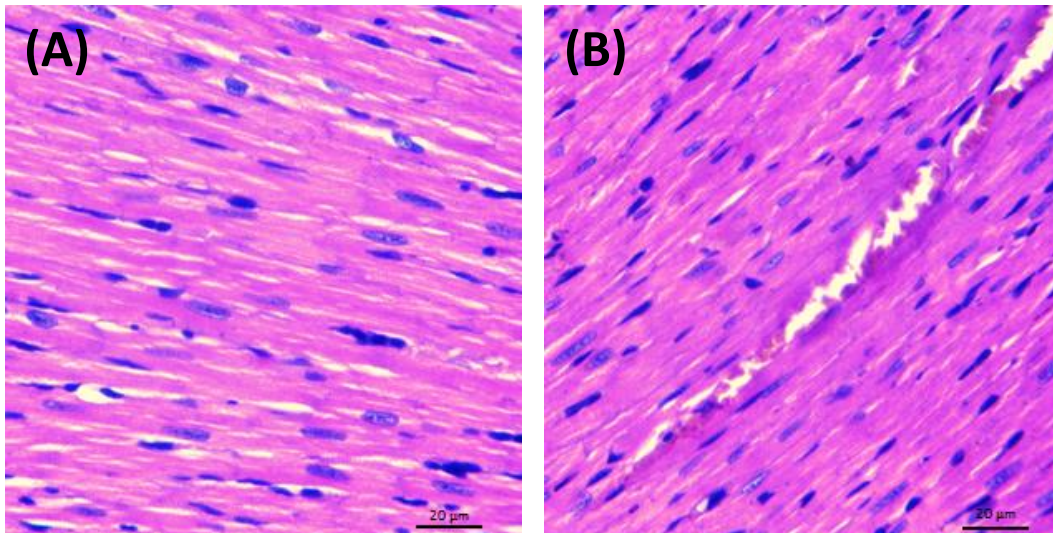

**Figure S1. Representative photomicrographs of H&E-stained cardiac sections (H&E staining  $\times 400$ , scale bar= 20 $\mu$ m). (A): Normal Control group showing the normal general architecture of cardiac tissue (B): Sunitinib group revealing disturbed general cardiac tissue architecture with degenerated fibers and congested blood vessels.**

CLUSTAL O(1.2.4) multiple sequence alignment

```

sp|Q16552|IL17_HUMAN      MTPGKTSLSL--LLLLSLEAIVKAGITIPRNP GCPNSEDKNFPRTVMVNLNIHNRN-TN  57
sp|Q62386|IL17_MOUSE      MSPGRASSVSLMLLLLLSLAATVKAAAIIPQSSACPNT EAKDFLQNVKVNLIKVFNSLGAK  60
sp|Q61453|IL17_RAT        -----MCLMLLLLLNLEATVKA AVLIPQSSVCPNAEANNFLQNVKVNLIKVINSLSSK  52
                          :,*  ***,* * ***, **: , ***: * :,* ***: *  ::

sp|Q16552|IL17_HUMAN      TNPKRSSDYNNRSTSPWNLHRNEDPERYP SVIWEAKCRHLGCINADGMVDYHMHNSVPIQQ  117
sp|Q62386|IL17_MOUSE      VSSRRP SDYLN RSTSPWTLHRNEDPDRYP SVIWEAQRHQR CVNAEGKLDHMHNSVLIQQ  120
sp|Q61453|IL17_RAT        ASSRRP SDYLN RSTSPWTL SRNEDPDRYP SVIWEAQRHQR CVNAEGKLDHMHNSVLIQQ  112
                          .. :* *** *****,* *****:*****:*** *:***:***:***** ***

sp|Q16552|IL17_HUMAN      EILVLRREPPHCPNSFRLEKILVSVGCTCVTPIVHVA  155
sp|Q62386|IL17_MOUSE      EILVLRREPEKCPFTFRVEKMLVGVGCTCVASIVRQAA  158
sp|Q61453|IL17_RAT        EILVLRREPEKCPFTFRVEKMLVGVGCTCVSSIVRHAS  150
                          ***** ** :*:***:***:*****: **:::

```

**Figure S2. Sequence and structural alignments human IL17 A, IL17 A mouse and rat IL17 A.** Clustal Omega 1.2.4 was used to align the human amino acid sequences of IL17 A and the sequence of IL17 A of mouse and rat, indicating conservation of the most amino acid residues. Clustal O; which "\*" means that the residues are identical, ":" means that conserved substitutions have been observed, "." means that semi-conserved substitutions are observed. The residues are colored according to their chemical properties where red, small hydrophobic (AVFPMILWY); blue, acidic (DE); purple, basic (RHK); green, hydroxyl + amine + basic (STYHCNGQ).

There are 74.7 and 78.1 % amino acid similarity between IL17 A human and both IL17A mouse and IL17 A rat, respectively. (Table 1), indicating conservation of most amino residues.

**Table S2.** BLAST analysis between human IL17 A and both IL17 A mouse and rat.

| Organism   | Sequence identity% | Positive % | Chain length | E-Value             |
|------------|--------------------|------------|--------------|---------------------|
| IL17 mouse | 62.0               | 74.7%      | 158          | 5.8e <sup>-63</sup> |
| IL17 rat   | 62.3               | 78.1       | 150          | 1.7e <sup>-60</sup> |
